# Supplementary material
Source: PubMed Central journal article supplement (PMC4558306)
Supplement: NIHMS703114-supplement-supplemental_material.pdf [file NIHMS703114-supplement-supplemental_material.pdf]

## SUPPLEMENTAL MATERIAL

**Supplemental Table 1.** Comparison of baseline characteristics between participants who were followed-up and those lost to follow-up.

| Characteristics (Mean, SD or %)      | Lost to follow-up (N=258) | Followed-up (N=1,828) | P-value |
|--------------------------------------|---------------------------|-----------------------|---------|
| SBP (mmHg)                           | 160.9 (30.1)              | 161.4 (28.5)          | 0.81    |
| DBP (mmHg)                           | 93.4 (19.9)               | 92.1 (16.5)           | 0.25    |
| Age (Years)                          | 61.7 (11.8)               | 59.8 (11.7)           | 0.02    |
| Body mass index (kg/m <sup>2</sup> ) | 23.0 (4.5)                | 23.9 (4.8)            | <0.05   |
| Gender                               |                           |                       | <0.05   |
| Male (%)                             | 42.2                      | 32.8                  |         |
| Female (%)                           | 57.8                      | 67.2                  |         |
| Education (%)                        |                           |                       | 0.92    |
| Illiterate                           | 61.4                      | 60.2                  |         |
| Primary school or under              | 22.9                      | 23.9                  |         |
| Middle school                        | 4.8                       | 5.6                   |         |
| High school                          | 8.0                       | 6.9                   |         |
| College or above                     | 2.8                       | 3.3                   |         |
| Current smoker (%)                   | 39.2                      | 36.8                  | 0.46    |
